# JET IMPINGEMENT HEAT TRANSFER VISUALIZATION USING A STEADY STATE LIQUID CRYSTAL METHOD

Eric Esposito and Srinath V. Ekkad

Louisiana State University Department of Mechanical Engineering  
Baton Rouge, LA 70803

## Steady State Approach Using Heater Foil

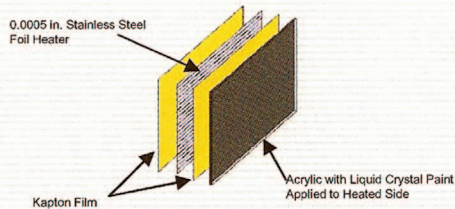

## Experimental Test Rig

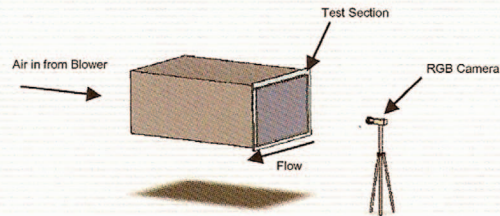

## Pictures Taken During Experiment with Increasing Heater Flux

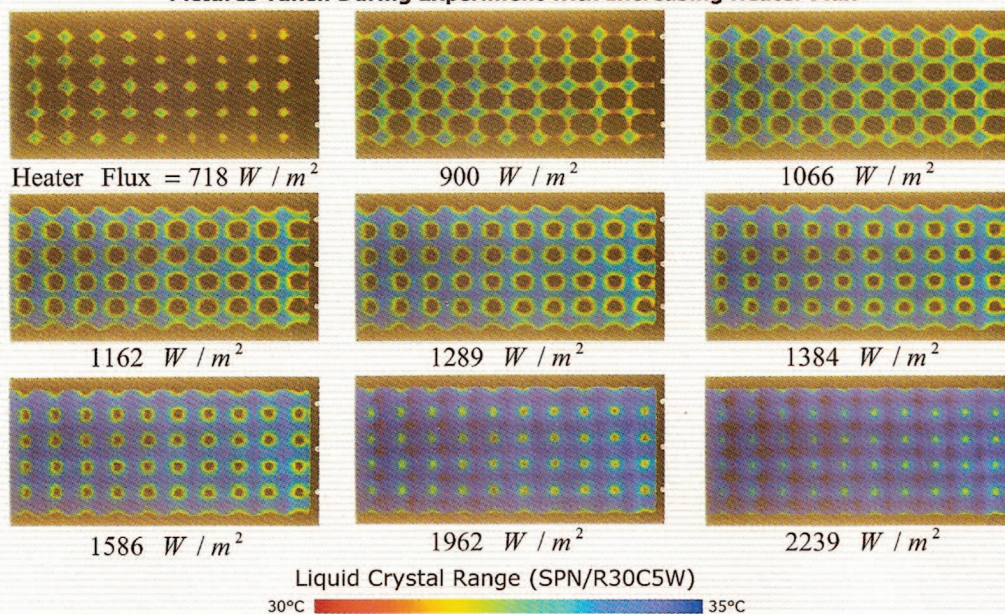

## Experimental Procedure:

- Blower is set appropriately for required jet Reynolds number
- Heater is turned on and allowed to reach steady state
- A picture is taken of the liquid crystal coated test plate and heater amperage and voltage measured
- Heater power is incrementally increased and additional pictures taken to capture temperature and heater flux data at every point in the array
- Pictures are converted to Hue and liquid crystal calibration curve used to determine temperature at corresponding point

## Results

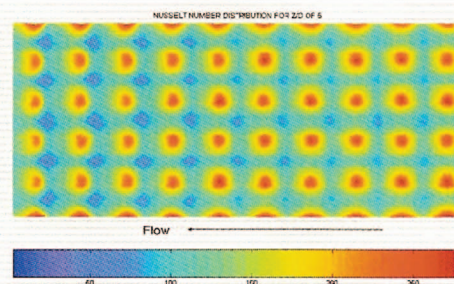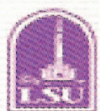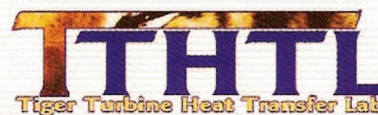

Source: https://asmedc.silverchair.com/heattransfer/article-pdf/128/8/738/5664963/738_1.pdf
